# Supplementary material for: The interplay between miR156/SPL13 and DFR/WD40–1 regulate drought tolerance in alfalfa
Source: BMC Plant Biol. 2019 Oct 21;19:434. doi: 10.1186/s12870-019-2059-5 (PMC6802326; doi:10.1186/s12870-019-2059-5)
Supplement: Supplementary file 1 — Additional file 1: Table S1. List of primers used and their nucleotide sequences. [file 12870_2019_2059_MOESM1_ESM.xlsx]

## Sheet: Sheet1
Table S1: List of primers used and their nucleotide sequence
			Primer sequence
No	Primer name	Name of the gene	Forward primer	Reverse primer	Amplicon	Annealing	Sequences	Purpose
					size (bp)	Temp.	obtained from
1	DFR	Dihydroflavonol 4-reductase	GTTTGTGTCACAGGGGCTTC	TTCAAGTTTTCTGGGTCGCG	107	58	M. truncatula	qRT-PCR
2	proDFR-1	Dihydroflavonol 4-reductase promoter region I	CAAGGGTGAGGCTGTGATGT	CTGCCCCTGATTGTTGGTAT	144	57	Medicago sativa	ChIP-qPCR
3	proDFR-2	Dihydroflavonol 4-reductase promoter region II	GGCAGACATAGACTCACC	GCAATTGTGACTTGCTTC	190	56	Medicago sativa	ChIP-qPCR
4	proDFR-3	Dihydroflavonol 4-reductase promoter region III	CCATACCCCTTACTAATGTAC	CAAATGGTATGGACAATGC	177	55	Medicago sativa	ChIP-qPCR
5	proDFR1-MTR	Dihydroflavonol 4-reductase promoter 1	TTAGGGTGAGGCTGTGATGT	TCCATCACCACACTCTCTTG	2019	58	M. truncatula	DFR promoter region obtainment
6	proDFR2-MTR	Dihydroflavonol 4-reductase promoter 2	TGCATCTAACAGTCCCTTGC	TCCATCACCACACTCTCTTG	2092	58	M. truncatula	DFR promoter region obtainment
7	proDFR3-MTR	Dihydroflavonol 4-reductase promoter 3	AGGGTGAGGCTGTGATGTAT	ACCCAGTACCTCCAGTTA	2054	58	M. truncatula	DFR promoter region obtainment
8	LOB1	Lateral organ baundaries-Like 1	AAGTGTTGGGGAAGTAGTGGAG	GCGAAACGCAATGATGAATGTA	142	58	Medicago sativa	ChIP-qPCR
9	MYB112	myb transcription factor 112	TGGGTGATGGAGGTGAAGAA	CACCGTTGTTTGAGGTTTGG	120	57.5	M. truncatula	qRT-PCR
10	WD40-1	WD40-1 transcription factor	GGATGAATCTGTGAACGCCG	CTTTGTCCACGGCTCAAACA	100	58	M. truncatula	qRT-PCR
11	PSI	Photosystem I P700 chlorophyll A	GCTACTAGGACTTGGGTCTCTTTC	AGGAAGTGGGATCTCTTTGG	109	57.5	M. truncatula	qRT-PCR
12	PSII	Photosystem II Q(B)	CGCAGCTCCTCCAGTAGATATT	CCGCCGAAGTAGGAATAATG	108	57.5	M. truncatula	qRT-PCR
13	FGT2	Flavonoid glucosyltransferase-2	ATAAGAGGTTGGGCACCACA	CATTGGTAACCCTGCACTCA	114	58	M. truncatula	qRT-PCR
14	DRR	Dehydration-responsive RD22-like protein	GGTTGGTGATGTGAATGGAG	CTTCCCTGGCTTGATCCTTA	115	58	M. truncatula	qRT-PCR
15	PAL	Phenylalanine ammonia-lyase, PAL1	CGTTGGTTAAAATCGGCGGT	CTCCGAAAGCTCCACCCTAA	92	58	M. truncatula	qRT-PCR
16	WD40-SP1	WD40-1 specific primer 1 with AP1	GTAATACGACTCACTATAGGGC	CAGTTGCACACTTGTATGTCCCAACTC	-	67	Medicago sativa	Genome walking
17	WD40-SP2	WD40-1 specific primer 2 with AP2	ACTATAGGGCACGCGTGGT	GTAGTCCGTTGTTCCTACACGCGATTT	-	67	Medicago sativa	Genome walking
18	B1/2-WD40-1	WD40-1 transcription factor	GGGGACAAGTTTGTACAAAAAAGCAGGCTTCTTTCACAACACACTCCTTCA	GGGGACCACTTTGTACAAGAAAGCTGGGTCTTGCTATTTGCAGCACCAAG	1700		M. truncatula	WD40-1OE construction
19	B1/2-WD40-1-RNAi	WD40-1 transcription factor	GGGGACAAGTTTGTACAAAAAAGCAGGCTTCGGCTACTGGGAATCAGGACA	GGGGACCACTTTGTACAAGAAAGCTGGGTCAGCCTCTGTGTCAGGGCTAA	253		M. truncatula	WD40-1RNAi construction
20	WD1-qPCR-F/R	WD40-1 transcription factor	AGCCAGCAGACTTTGTCCAT	AGCCTCTGTGTCAGGGCTAA	117	58	M. truncatula	qRT-PCR
21	Acc1	Acetyl CoA Carboxylase1	GATCAGTGAACTTCGCAAAGTAC	CAACGACGTGAACACTACAAC	91	58	Medicago sativa	qRT-PCR
22	Acc2	Acetyl CoA Carboxylase2	GATCAGTGAACTTCGCAAAGTAC	GAGGGATGCTGCTACTTTGATG	154	58	Medicago sativa	qRT-PCR
